# Supplementary material
Source: Springer Nature journal article supplement (https://www.springermedizin.de/resource/supplementary/12875_2011_643_MOESM2_ESM.pdf/9434846)

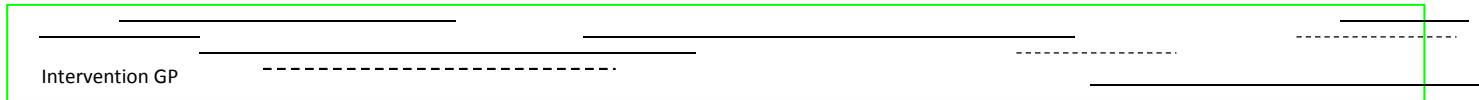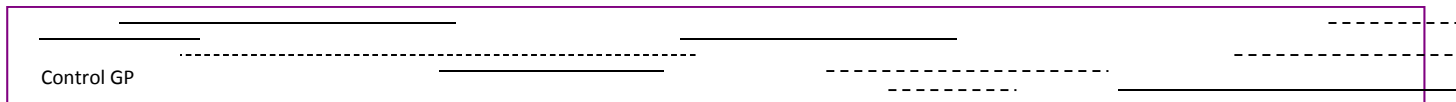

t=1

t=2

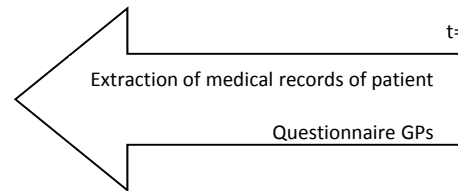

Identified palliative patient

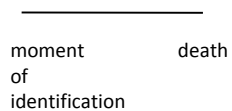

Not identified palliative patient

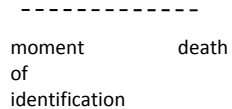

Supplement: MOESM2 [file 9434846]
